# Supplementary material for: Molecularly Defined Subsets of Ewing Sarcoma Tumors Differ in Their Responses to IGF1R and WEE1 Inhibition
Source: Oxford University Press journal article supplement (doi:10.1158/1078-0432.ccr-22-2587), 2022-11-17
Supplement: ccr-22-2587_supplementary_data_file_s1_suppds1.xlsx [file ccr-22-2587_supplementary_data_file_s1_suppds1.xlsx]

## Sheet: Figure-1
Fig-1C
	pY980-IGF1R b	Tubulin	pY980 IGF1Rb/tubulin	fold change
CCH1	0	3975460	0	#DIV/0!
CCH2	2165055	2522448	0.858315	#DIV/0!
	pY1135-IGF1R b	Tubulin	pY1135 IGF1Rb/tubulin	fold change
CCH1	0	3975460	0	#DIV/0!
CCH2	811923	2522448	0.321879	#DIV/0!
	IGF1R b	Tubulin	IGF1Rb/tubulin	fold change
CCH1	62284184	3975460	15.6672	1
CCH2	535256	2522448	0.212197	0.0135441
	IR	Tubulin	IR/tubulin	fold change
CCH1	76796640	3975460	19.3177	1
CCH2	29824296	2522448	11.8236	0.612059
Fig-1D
											pT308 AKT	Tubulin	pT308 AKT/tubulin
										CCH1	25818144	3975460	6.49438
	pERK	Tubulin	pERK/tubulin							CCH2	43077160	2522448	17.0775
CCH1	1735461	3975460	0.436543
CCH2	11262159	2522448	4.46477								pS473 AKT	Tubulin	pS473/tubulin
										CCH1	239447	3975460	0.0602313
	ERK	Tubulin	ERK/tubulin							CCH2	3194148	2522448	1.26629
CCH1	2063254	3975460	0.518998
CCH2	15125422	2522448	5.99633								AKT	Tubulin	AKT/tubulin
										CCH1	27398294	3975460	6.89186
										CCH2	49870438	2522448	19.7707
Fig-1G
	pY980-IGF1R b	Tubulin	pY980 IGF1Rb/tubulin				pY1135-IGF1R b	Tubulin	pY1135 IGF1Rb/tubulin				IGF1R b	Tubulin	IGF1Rb/tubulin			IR-b	Tubulin	IR/tubulin
Control	0	6627502	0			Control	0	6627502	0			Control	2427600	6627502	0.366292		Control	24364406	6627502	3.67626
IGF1	3841092	5626830	0.682639			IGF1	2565200	5626830	0.455887			IGF1	2408928	5626830	0.428115		IGF1	29848010	5626830	5.30459
Lin	0	5495041	0			Lin	0	5495041	0			Lin	1817368	5495041	0.330729		Lin	25781709	5495041	4.69181
IGF1+Lin	0	6179974	0			IGF1+Lin	0	6179974	0			IGF1+Lin	2073864	6179974	0.335578		IGF1+Lin	26235820	6179974	4.2453
	pY980-IGF1R b	Tubulin	pY980 IGF1Rb/tubulin				pY1135-IGF1R b	Tubulin	pY1135 IGF1Rb/tubulin				IGF1R b	Tubulin	IGF1Rb/tubulin			IR-b	Tubulin	IR/tubulin
Control	1034649	7483743	0.138253			Control	0	7483743	0			Control	1063140	7483743	0.14206		Control	8069620	7483743	1.07829
IGF1	12027251	6133944	1.96077			IGF1	2480564	6133944	0.4044			IGF1	765160	6133944	0.124742		IGF1	5108220	6133944	0.832779
Lin	3251413	5006700	0.649412			Lin	0	5006700	0			Lin	718912	5006700	0.14359		Lin	4504484	5006700	0.899691
IGF1+Lin	3185154	4892566	0.651019			IGF1+Lin	0	4892566	0			IGF1+Lin	1156764	4892566	0.236433		IGF1+Lin	6726816	4892566	1.37491
Fg-1H
	pERK	Tubulin	pERK/tubulin			ERK	Tubulin	ERK/tubulin			pS473 AKT	Tubulin	pS473/tubulin			pT308 AKT	Tubulin	pT308 AKT/tubulin			AKT	Tubulin	AKT/tubulin
Control	52178674	6627502	7.87305		Control	27830528	6627502	4.19925		Control	642600	6627502	0.0969596		Control	0	6627502	0		Control	50195796	6627502	7.57386
IGF1	33616387	5626830	5.9743		IGF1	19521448	5626830	3.46935		IGF1	3372780	5626830	0.59941		IGF1	1072209	5626830	0.190553		IGF1	42527536	5626830	7.55799
Lin	44322804	5495041	8.06596		Lin	15555280	5495041	2.83079		Lin	0	5495041	0		Lin	0	5495041	0		Lin	34570952	5495041	6.2913
IGF1+Lin	44386500	6179974	7.18231		IGF1+Lin	23823075	6179974	3.85488		IGF1+Lin	0	6179974	0		IGF1+Lin	0	6179974	0		IGF1+Lin	47906806	6179974	7.75194
	pERK	Tubulin	pERK/tubulin			ERK	Tubulin	pERK/tubulin			pS473 AKT	Tubulin	pS473/tubulin			pT308 AKT	Tubulin	pT308 AKT/tubulin			AKT	Tubulin	AKT/tubulin
Control	8311894	7483743	1.11066		Control	21320260	7483743	2.84888		Control	1773315	7483743	0.236956		Control	258951	7483743	0.0346018		Control	83009500	7483743	11.092
IGF1	11272760	6133944	1.83777		IGF1	15439200	6133944	2.51701		IGF1	14792220	6133944	2.41153		IGF1	2450513	6133944	0.3995		IGF1	81465083	6133944	13.281
Lin	4635880	5006700	0.925935		Lin	12694000	5006700	2.5354		Lin	1126620	5006700	0.225022		Lin	0	5006700	0		Lin	55613402	5006700	11.1078
IGF1+Lin	3711970	4892566	0.758696		IGF1+Lin	12325320	4892566	2.51919		IGF1+Lin	730892	4892566	0.149388		IGF1+Lin	0	4892566	0		IGF1+Lin	51031797	4892566	10.4305

## Sheet: Figure-2
Fig-2A		p-ATR	Tubulin	p-ATR/tubulin			ATR	Tubulin	ATR/tubulin			p-CHK1	Tubulin	p-CHK1/tubulin			CHK1	Tubulin	CHK1/tubulin				p-RPA	Tubulin	p-RPA/tubulin			RPA	Tubulin	RPA/tubulin
	CCH1	0	9312396	0		CCH1	2860928	9312396	0.307217		CCH1	0	767120	0		CCH1	7254640	767120	9.45698			CCH1	733570	9679800	0.0757836		CCH1	0	9679800	0				g-H2AX	Tubulin	Υ-H2AX/tubulin
	CCH2	1534698	6962880	0.220411		CCH2	5898880	6962880	0.84719		CCH2	1270854	631972	2.01093		CCH2	8662010	631972	13.7063			CCH2	4502820	6451032	0.698		CCH2	4290276	6451032	0.665053			CCH1	0	15645820	0
																																	CCH2	5791725	16877054	0.343172
	p-ATR			ATR			Tubulin				p-CHK1				CHK1			Tubulin																CL-CASP3	Tubulin	CL-CASP3/tubulin
																																	CCH1	0	15645820	0
																																	CCH2	16757485	16877054	0.992915
Fig-2B	RRM2	Tubulin	RRM2/tubulin																																							CyclinA2	Tubulin	normalized	fold change				Cyclin D1
CCH1	0	3377584	0									RAD21	Tubulin	RAD21/tubulin										Wee1	Tubulin	Wee1/tubulin	fold change														CCH1	119970408	1005100	119.362	1			CCH1	85479250
CCH2	1355598	4901380	0.276575								CCH1	1142399	2341758	0.487838									CCH1	306615920	389350	787.507	1														CCH2	85243230	761582	111.929	0.937731			CCH2	15649150
											CCH2	151008	1670310	0.0904072									CCH2	105260880	453915	231.896	0.294468
Fig-2D			CCH1
			pRPA	Tubulin	Normalized with tubulin	Fold change
		Control	1443420	892914	1.61653	1
		Dansyl	3233633	751290	4.30411	2.66256
			RPA	Tubulin	Normalized with tubulin	Fold change
		Control	9389380	892914	10.5154	6.50495
		Dansyl	8193312	751290	10.9057	6.74635
			pCHK1	Tubulin	Normalized with tubulin	Fold change
		Control	95000	892914	0.106393	0.0658159
		Dansyl	497760	751290	0.66254	0.409854
			CHK1	Tubulin	Normalized with tubulin	Fold change
		Control	275123913	892914	308.119	190.606
		Dansyl	124788537	751290	166.099	102.751
Fig-2H		p-ATR	Tubulin	p-ATR/tubulin			ATR	Tubulin	ATR/tubulin			p-CHK1	Tubulin	p-CHK1/tubulin			CHK1	Tubulin	CHK1/tubulin				p-RPA	Tubulin	p-RPA/tubulin			RPA	Tubulin	RPA/tubulin				RRM2	Tubulin	RRM2/tubulin								CyclinA2	Tubulin	normalized	fold change
	CCH1	0	3717140	0		CCH1	232664	3717140	0.0625922		CCH1	128820	5528005	0.0233032		CCH1	8668728	5528005	1.56815			CCH1	566322	3717140	0.152354		CCH1	13380136	3717140	3.59958			CCH1	425780	1151257	0.430394							CCH1	232294510	3185922	72.9128	1	CCH1
	CCH2	357750	4932742	0.0725256		CCH2	5477256	4932742	1.11039		CCH2	1018129	6936986	0.146768		CCH2	24927084	6936986	3.59336			CCH2	998242	4932742	0.202371		CCH2	20385735	4932742	4.13274			CCH2	1627719	989280	1.64536							CCH2	94259165	2566560	36.7259	0.503696	CCH2
[truncated: 3 more columns]

## Sheet: Figure-3
Fig-3C
	pY980 IGF1R	tubulin	noralized	fold change w.r.t CCH1
CCH1	1570744	6923000	0.226888	1
CCH2	4911760	3241896	1.51509	6.6777												IGF1R	tubulin	noralized	fold change w.r.t CCH1
CCH5	1493716	4210104	0.354793	1.56374											CCH1	5604300	2358328	2.37639	1
NCH6	2969008	2611512	1.13689	5.01081											CCH2	495495	2015352	0.24586	0.10346
															CCH5	4514055	3117512	1.44797	0.609315
							pY980 IGF1R					tubulin			NCH6	4256070	2548400	1.67009	0.702787				Pro-IGF1R					tubulin
																							IGF1Rb
	pY1135 IGF1R	tubulin	noralized	fold change w.r.t CCH1
CCH1	732400	1534020	0.477438	1												IR	tubulin	noralized	fold change w.r.t CCH1
CCH2	1657400	616050	2.69037	5.635											CCH1	3029328	2358328	1.28452	1
CCH5	915000	1288710	0.710012	1.48713											CCH2	5704308	2015352	2.83043	2.20348
NCH6	1425400	1014170	1.40548	2.9438											CCH5	2170671	3117512	0.696283	0.542056				Pro InsR
															NCH6	3075069	2548400	1.20667	0.939388									tubulin
							pY1135 IGF1R					tubulin											InsR b
																			s			InsR
GEL-B	GEL-B	GEL-B	GEL-B	GEL-B	GEL-B	GEL-B	GEL-B	GEL-B	GEL-B	GEL-B	GEL-B	GEL-B	GEL-B	GEL-B	GEL-B	GEL-B	GEL-B	GEL-B	GEL-B	GEL-B	GEL-B	GEL-B	GEL-B	GEL-B	GEL-B	GEL-B	GEL-B	GEL-B	GEL-B	GEL-B	GEL-B	GEL-B	GEL-B	GEL-B	GEL-B	GEL-B	GEL-B	GEL-B	GEL-B	GEL-B	GEL-B	GEL-B	GEL-B	GEL-B	GEL-B	GEL-B	GEL-B	GEL-B	GEL-B
Fig-3D
	g-H2AX	tubulin	noralized	fold change w.r.t CCH1
CCH1	873776	1534020	0.569599	1												RRM2	tubulin	noralized	fold change w.r.t CCH1
CCH2	5136150	616050	8.33723	14.637											CCH1	1172352	1534020	0.764235	1
CCH5	849526	1288710	0.659206	1.15732											CCH2	4564032	616050	7.40854	9.69406
NCH6	13754600	1014170	13.5624	23.8105											CCH5	924096	1288710	0.717071	0.938285
															NCH6	8663424	1014170	8.54238	11.1777
							g-H2AX				tubulin
																												tubulin
																							RRM2
	pATR	tubulin	noralized	fold change w.r.t CCH1												ATR	tubulin	noralized	fold change w.r.t CCH1
CCH1	267305	1534020	0.174251	1											CCH1	97465	1534020	0.0635357	1
CCH2	1080221	616050	1.75346	10.0628											CCH2	576298	616050	0.935473	14.7236
CCH5	0	1288710	0	0											CCH5	146101	1288710	0.11337	1.78435
NCH6	813688	1014170	0.802319	4.60438											NCH6	131433	1014170	0.129597	2.03975
							pATR					tubulin											ATR					tubulin
	WEE1	tubulin	noralized	fold change w.r.t CCH1
CCH1	14989410	2067975	7.24835	0.34008
CCH2	3796774	1539915	2.46557	0.115681
CCH5	38259516	1987635	19.2488	0.903119												RAD21	tubulin	noralized	fold change w.r.t CCH1
NCH6	11242882	1520025	7.39651	0.347032											CCH1	2712255	2067975	1.31155	1
															CCH2	422760	1539915	0.274535	0.209321
											tubulin				CCH5	2244840	1987635	1.1294	0.86112
							WEE1								NCH6	650715	1520025	0.428095	0.326404
																												tubulin
																								RAD21
	pRPA	tubulin	noralized	fold change w.r.t CCH1
CCH1	4684858	2067975	2.26543	1												pCHK1	tubulin	noralized	fold change w.r.t CCH1
CCH2	20704557	1539915	13.4453	5.93496											CCH1	0	2067975	0	#DIV/0!
CCH5	9136488	1987635	4.59666	2.02904											CCH2	305550	1539915	0.19842	#DIV/0!
NCH6	6544115	1520025	4.30527	1.90042											CCH5	0	1987635	0	#DIV/0!
															NCH6	1354314	1520025	0.890981	#DIV/0!
							pRPA				tubulin												pCHK1					tubulin
	CHK1	tubulin	noralized	fold change w.r.t CCH1												RPA	tubulin	noralized	fold change w.r.t CCH1
CCH1	50264565	2358328	21.3136	1											CCH1	0	2358328	0	#DIV/0!
CCH2	89835915	2015352	44.5758	2.09142											CCH2	10816048	2015352	5.36683	#DIV/0!
CCH5	19445205	3117512	6.23741	0.292649											CCH5	0	3117512	0	#DIV/0!
NCH6	102955905	2548400	40.4002	1.89551											NCH6	15269270	2548400	5.99171	#DIV/0!
																												tubulin
											tubulin
							CHK1																	RPA
[truncated: 5,000 more columns]

## Sheet: Figure-4
Fig-4B
Fig-4C
Fig-4E
INPUT
Fig-4F
INPUT

## Sheet: Figure-5
Fig 5I																			CCH5
CCH1																				WEE1	Tubulin	WEE1/tubulin	fold change														CCH2
	WEE1	Tubulin	WEE1/tubulin	fold change															Control	15814650	2735965	5.78028	1															WEE1	Tubulin	WEE1/tubulin	fold change
Control	24456250	1605800	15.2299	1															Linsitinib (5uM)	4639584	2741515	1.69234	0.292779														Control	25373499	2350026	10.7971	1
Linsitinib (5uM)	9182446	1485739	6.18039	0.405805															AZD1775 (1 uM)	14688234	2689715	5.46089	0.944744														Linsitinib (5uM)	24749835	2190699	11.2977	1.04636
AZD1775 (1uM)	18889332	1916970	9.85374	0.646998															Lin.+AZD	3626628	2624410	1.38188	0.239068														AZD1775 (1uM)	22479354	2483649	9.05094	0.838274
Lin.+AZD	4456452	1898470	2.34739	0.15413																																	Lin.+AZD	11946057	2469663	4.83712	0.448001
																				pCDK1	Tubulin	pCDK1/tubulin	fold change
	pCDK1	Tubulin	pCDK1/tubulin	fold change															Control	228290956	2735965	83.4407	1															pCDK1	Tubulin	pCDK1/tubulin	fold change
Control	38692554	1605800	24.0955	1															Linsitinib (5uM)	61283885	2741515	22.354	0.267903														Control	239772624	2350026	102.03	1
Linsitinib (5uM)	10306406	1485739	6.93689	0.287891															AZD1775 (1 uM)	94160906	2689715	35.0078	0.419552														Linsitinib (5uM)	157037790	2190699	71.6839	0.702578
AZD1775 (1uM)	12903908	1916970	6.73141	0.279364															Lin.+AZD	33560296	2624410	12.7877	0.153255														AZD1775 (1uM)	148705102	2483649	59.8736	0.586825
Lin.+AZD	3501591	1898470	1.84443	0.0765466																																	Lin.+AZD	88969062	2469663	36.0248	0.353081
																				CDK1	Tubulin	CDK1/tubulin	fold change
	CDK1	Tubulin	CDK1/tubulin	fold change															Control	576758	2735965	0.210806	1															CDK1	Tubulin	CDK1/tubulin	fold change
Control	1334788	1605800	0.831229	1															Linsitinib (5uM)	473928	2741515	0.172871	0.820047														Control	269981082	2350026	114.884	1
Linsitinib (5uM)	904904	1485739	0.60906	0.732722															AZD1775 (1 uM)	628446	2689715	0.233648	1.10835														Linsitinib (5uM)	196321032	2190699	89.6157	0.780052
AZD1775 (1uM)	1025752	1916970	0.53509	0.643734															Lin.+AZD	364000	2624410	0.138698	0.65794														AZD1775 (1uM)	130977975	2483649	52.7361	0.459037
Lin.+AZD	786058	1898470	0.414048	0.498115																																	Lin.+AZD	168814020	2469663	68.3551	0.594991
																				RRM2	Tubulin	RRM2/tubulin	fold change
	RRM2	Tubulin	RRM2/tubulin	fold change															Control	1657972	2735965	0.605992	1															RRM2	Tubulin	RRM2/tubulin	fold change
Control	1318884	1516878	0.869473	1															Linsitinib (5uM)	1553068	2741515	0.5665	0.934831														Control	59730232	781075	76.4718	1
Linsitinib (5uM)	1491360	1753391	0.850558	0.978245															AZD1775 (1 uM)	1263548	2689715	0.46977	0.775209														Linsitinib (5uM)	40035270	749047	53.4483	0.698928
AZD1775 (1uM)	1397298	1701557	0.821188	0.944467															Lin.+AZD	1125932	2624410	0.429023	0.707968														AZD1775 (1uM)	9013064	667250	13.5078	0.176637
Lin.+AZD	1157656	1516552	0.763347	0.877943																																	Lin.+AZD	2062750	775737	2.65908	0.0347721
																				Cleaved caspase-3		17+15	Tubulin	CC3/tubulin	Fold change
	Cleaved caspase-3		17+15	Tubulin	CC3/tubulin	Fold change														17kDa	15 kDa																	Cleaved caspase-3		17+15	Tubulin	CC3/tubulin	fold change
	17kDa	15 kDa																	Control	1898688	746418	2645106	2735965	0.966791	#DIV/0!													17kDa	15 kDa
Control	0	174717	174717	1104250	0.158222	1													Linsitinib (5uM)	962178	700290	1662468	2741515	0.606405	#DIV/0!												Control	168973	1239877	1408850	781075	1.80373	1
Linsitinib (5uM)	0	321937	321937	769044	0.41862	2.64577													AZD1775 (1 uM)	2125236	628866	2754102	2689715	1.02394	#DIV/0!												Linsitinib (5uM)	2283440	5855800	8139240	749047	10.8661	6.02425
AZD1775 (1uM)	44997	1210391	1255388	813375	1.54343	9.75482													Lin.+AZD	480624	2028702	2509326	2624410	0.956149	#DIV/0!												AZD1775 (1uM)	3967500	10373920	14341420	667250	21.4933	11.916
Lin.+AZD	595700	1771560	2367260	697935	3.39181	21.437																															Lin.+AZD	10984635	32088945	43073580	775737	55.526	30.784

## Sheet: Figure-6
Fig-6G
CCH1							CCH2
	WEE1	Tubulin	WEE1/tubulin	fold change				WEE1	Tubulin	WEE1/tubulin	fold change
Control	6488832	2889908	2.24534	1			Control	734604	1128071	0.651204	1
Linsitinib	2496960	2065322	1.20899	0.538445			Linsitinib	1000620	1143296	0.875206	1.34398
	pCDK1	Tubulin	pCDK1/tubulin	fold change				pCDK1	Tubulin	pCDK1/tubulin	fold change
Control	20000981	2889908	6.92097	1			Control	2906351	1128071	2.57639	1
Linsitinib	6092842	2065322	2.95007	0.42625			Linsitinib	6745487	1143296	5.90004	2.29004
	CDK1	Tubulin	CDK1/tubulin	fold change				CDK1	Tubulin	cdk1/tubulin	fold change
Control	168875497	2889908	58.4363	1			Control	10562902	1128071	9.36369	1
Linsitinib	98942809	2065322	47.9067	0.819811			Linsitinib	23574593	1143296	20.6199	2.20211

## Sheet: Figure-S1
Fig-S1
	pY772 EphA2	tubulin	pY772 EphA2/tubulin	FOLD CHANGE			pY772 EphA2		pY897 EpHA2		EphA2		Tubulin
CCH1	18319404	374934750	0.0488602	1
CCH2	2287120	280423800	0.00815594	0.166924
	pS897 EphA2	tubulin	pS897 EphA2/tubulin	FOLD CHANGE										Tubulin
CCH1	107967694	374934750	0.287964	1
CCH2	32276200	280423800	0.115098	0.399696
	EphA2	tubulin	EphA2/tubulin	FOLD CHANGE
CCH1	254874816	374934750	0.679784	1
CCH2	73009791	280423800	0.260355	0.382997

## Sheet: Figure-S2
Figure-S2D
Cells
	CyclinA2	Tubulin	normalized	fold change									Cyclin D1	Tubulin	normalized	fold change
CCH5	148258548	509534	290.969	2.43771								CCH5	75614865	509534	148.4	1.74495
NCH6	93382521	515740	181.065	1.51695								NCH6	18298720	515740	35.4805	0.417194

## Sheet: Figure-S4
Figure S4 A
	py1135 IGF1R	tubulin	pY1135 IGF1R/tubulin				py980 IGF1R	tubulin	pY980 IGF1R/tubulin
A673	560	881535	0.000635256			A673	657	881535	0.000745291
RDES	1581125	780549	2.02566			RDES	1950668	780549	2.4991
SKES	247100	945027	0.261474			SKES	1031914	945027	1.09194
	IGF1R	Tubulin	IGF1R/tubulin				IR	Tubulin	IR/tubulin
A673	631516	881535	0.716382			A673	12439367	881535	14.111
RDES	2227288	780549	2.85349			RDES	4888190	780549	6.2625
SKES	2463232	945027	2.60652			SKES	3036824	945027	3.21348
	pT-AKT	tubulin	pT-AKT/tubulin				pS-AKT	tubulin	pS-AKT/tubulin
A673	6663275	881535	7.55872			A673	3766800	881535	4.273
RDES	9953474	780549	12.7519			RDES	4835055	780549	6.19443
SKES	3421406	945027	3.62043			SKES	2216050	945027	2.34496
	AKT	Tubulin	AKT/tubulin
A673	3389875	881535	3.84542
RDES	3950786	780549	5.06155
SKES	2746460	945027	2.90622
Figure S4 B
	pATR	tubulin	pATR/tubulin				ATR	tubulin	ATR/tubulin
A673	3143307	1296554	2.42435			A673	6832215	1296554	5.26952
RDES	6172824	1399202	4.41167			RDES	11999736	1399202	8.57613
SKES	4142980	1642476	2.5224			SKES	6372808	1642476	3.88
	p-CHK1	Tubulin	p-CHK1/tubulin				CHK1	Tubulin	CHK1/tubulin
A673	1361344	1296554	1.04997			A673	19936663	1296554	15.3767
RDES	3043444	1399202	2.17513			RDES	34490352	1399202	24.65
SKES	627806	1642476	0.382231			SKES	22291332	1642476	13.5718
	RRM2	Tubulin	RRM2/tubulin				RAD21	Tubulin	RAD21/tubulin
A673	13623104	1296554	10.5072			A673	683529	1296554	0.527189
RDES	12712656	1399202	9.08565			RDES	317604	1399202	0.226989
SKES	14019632	1642476	8.53567			SKES	343728	1642476	0.209274
	g-H2AX	Tubulin	g-H2AX/tubulin
A673	4264569	1296554	3.28916
RDES	7315380	1399202	5.22825
SKES	6940548	1642476	4.22566
Figure S4 C
	p-RPA	Tubulin	p-RPA/tubulin				RPA	Tubulin	RPA/tubulin
A673	438770	881535	0.497734			A673	7055720	881535	8.0039
RDES	2580600	780549	3.30613			RDES	10771650	780549	13.8001
SKES	286110	945027	0.302753			SKES	7.98004e+06	945027	8.44425
	pERK	tubulin	pERK/tubulin				ERK	tubulin	ERK/tubulin
A673	14571980	722378	20.1722			A673	7350148	722378	10.1749
RDES	245886	719448	0.34177			RDES	9694485	719448	13.4749
SKES	508896	865533	0.587957			SKES	8182040	865533	9.45318
	CC3			tubulin	CC3/tubulin			19+17+15
	19kDa	17 kDa	15 kDa		19kDa	17 kDa	15 kDa	Total CCC3
A673	648882	821811	243375	1296554	0.500467	0.633842	0.187709	1.32202
RDES	460731	579321	85491	1399202	0.329281	0.414037	0.0610998	0.804418
SKES	319308	265677	203550	1642476	0.194406	0.161754	0.123929	0.480089
